# Supplementary material
Source: PubMed Central journal article supplement (PMC4102959)
Supplement: cn500039b_si_001.pdf [file cn500039b_si_001.pdf]

# High Resolution Metabolite Imaging in the Hippocampus Following Neonatal Exposure to the Environmental Toxin BMAA using ToF-SIMS

*Jörg Hanrieder*<sup>1,2,\*</sup>, *Lorenz Gerber*<sup>3</sup>, *Åsa Persson Sandelius*<sup>4</sup>, *Eva B. Brittebo*<sup>5</sup>, *Andrew G. Ewing*<sup>1,2,4</sup>, *Oskar Karlsson*<sup>5,6</sup>

1 National Center for Imaging Mass Spectrometry, University of Gothenburg and Chalmers University of Technology, Gothenburg, Sweden

2 Department of Chemical and Biological Engineering, Chalmers University of Technology, Gothenburg Sweden

3 Umeå Plant Science Centre, Department of Forest Genetics and Plant Physiology Swedish University of Agricultural Sciences, Umeå, Sweden

4 Department of Chemistry and Molecular Biology, University of Gothenburg, Gothenburg, Sweden

5 Department of Pharmaceutical Biosciences, Drug Safety and Toxicology , Uppsala University, Uppsala, Sweden

6 Department of Environmental Toxicology, Uppsala University, Uppsala, Sweden

## **Content:**

**SI Table 1+2:** OPLS DA results

**SI Figures 1-4:** alternative color scheme for Figures 2,3,4,8

**SI Table 1:** Molecular species that were found changed in the CA1 between BMAA and control animals as revealed by OPLS DA.

| <b>positive ions</b> |                     |                              |                      |  |
|----------------------|---------------------|------------------------------|----------------------|--|
| Increased in         |                     |                              |                      |  |
| BMAA                 |                     |                              |                      |  |
| m/z                  | I.D. <sup>1</sup>   | Ratio BMAA/Ctrl <sup>2</sup> | Loading <sup>3</sup> |  |
| 22.99                | Na+                 | 1.20                         | 0.023                |  |
| 86.1                 | TME, C5H12N+        | 1.04                         | 0.010                |  |
| 104.1                | choline, C5H14NO+   | 1.09                         | 0.025                |  |
| 119.87               | K2CNO+              | 1.21                         | 0.013                |  |
| 166.88               | C5H13PNO3           | 1.07                         | 0.001                |  |
| 184.09               | C5H15PNO4+          | 1.02                         | 0.016                |  |
| 369.29               | cholesterol C27H45+ | 2.22                         | 0.014                |  |
| 496.25               | LPC (16:0)          | 1.76                         | 0.030                |  |
| 520.25               | LPC (18:2)          | 1.49                         | 0.031                |  |
| 523.42               | DAG(30:0-OH)        | 1.57                         | 0.021                |  |
| 524.48               | LPC (18:0)          | 1.78                         | 0.027                |  |
| 551.28               | DAG(32:0-OH)        | 1.66                         | 0.031                |  |
| 568.09               | PC (22:6)           | 2.47                         | 0.033                |  |
| 577.38               | DAG(34:1-OH)        | 1.81                         | 0.032                |  |
| 725.23               | SM(d18:1/16:0)+Na   | 1.64                         | 0.031                |  |
| 731.41               | SM(d18:1/18:0)      | 1.73                         | 0.022                |  |
| 734.39               | PC(32:0)            | 1.44                         | 0.020                |  |
| 753.54               | SM(d18:1/18:0)+Na   | 2.02                         | 0.030                |  |
| 756.39               | PC(32:0)+Na         | 1.94                         | 0.032                |  |
| 758.35               | PC(34:2)            | 1.76                         | 0.014                |  |
| 760.4                | PC(34:1)            | 1.22                         | 0.003                |  |
| 769.41               | SM(d18:1/18:0)+K    | 2.00                         | 0.032                |  |
| 770.15               | PC (32:0)+K         | 2.15                         | 0.027                |  |
| 770.41               | PC(32:1)+K          | 1.55                         | 0.034                |  |
| 772.36               | PC(32:0)+K          | 1.57                         | 0.029                |  |
| 780.19               | PC (34:2)+Na        | 2.12                         | 0.021                |  |
| 782.38               | PC(36:4)            | 1.55                         | 0.010                |  |
| 784.39               | PC(36:3)            | 1.52                         | 0.021                |  |
| 786.39               | PC(36:2)            | 1.63                         | 0.015                |  |
| 788.42               | PC(36:1)            | 1.51                         | 0.008                |  |
| 804.31               | PC(36:4)+Na         | 1.44                         | 0.007                |  |
| 806.31               | PC(38:6)            | 1.74                         | 0.014                |  |
| 810.4                | PC(38:4)            | 1.86                         | 0.015                |  |
| 820.31               | PC(36:4)+K          | 1.63                         | 0.008                |  |
| 822.27               | PC (36:3)+K         | 2.65                         | 0.010                |  |
| 824.29               | PC(36:2)+K          | 1.34                         | 0.006                |  |
| 826.36               | PC(36:1)+K          | 1.45                         | 0.007                |  |
| 832.42               | PC(38:4)+Na         | 1.71                         | 0.006                |  |
| 834.46               | PC (40:6)           | 2.21                         | 0.010                |  |

**negative ions**

Increased in

BMAA

| m/z    | I.D. <sup>1</sup>     | Ratio BMAA/Ctrl <sup>2</sup> | Loading <sup>3</sup> |
|--------|-----------------------|------------------------------|----------------------|
| 385.33 | cholesterol, C27H45O- | 1.38                         | 0.002                |
| 675.49 | PA(34:0)              | 1.07                         | 0.011                |
| 701.47 | PA(36:1)              | 1.23                         | 0.008                |
| 716.53 | PE(16:0/18:1)         | 1.08                         | 0.005                |
| 722.46 | PE(16:0p/20:4)        | 1.56                         | 0.027                |
| 726.52 | PE(18:1p/18:0)        | 1.46                         | 0.019                |
| 728.51 | PE(18:0p/18:0)        | 1.19                         | 0.006                |
| 742.52 | PE(18:1/18:1)         | 1.24                         | 0.008                |
| 746.48 | PE(16:0p/22:6)        | 1.13                         | 0.012                |
| 750.47 | PE(18:0p/20:4)        | 1.55                         | 0.025                |
| 762.52 | PE(16:0/22:6)         | 1.55                         | 0.024                |
| 764.52 | PE(18:1/20:4)         | 1.30                         | 0.019                |
| 766.49 | PE(18:0/20:4)         | 1.19                         | 0.006                |
| 774.59 | PE(18:0p/22:6)        | 1.08                         | 0.003                |
| 778.49 | ST(d18:1/16:0)        | 2.45                         | 0.034                |
| 786.54 | PS(36:2)              | 1.32                         | 0.006                |
| 788.51 | PS(36:1)              | 1.45                         | 0.011                |
| 790.49 | PE(18:0/22:6)         | 1.28                         | 0.013                |
| 794.5  | PE(18:0/22:4)         | 1.82                         | 0.032                |
| 806.55 | ST(d18:1/18:0)        | 1.81                         | 0.033                |
| 810.47 | PS(18:0/20:4)         | 1.62                         | 0.024                |
| 816.5  | PS(18:0/20:1)         | 1.48                         | 0.023                |
| 805.29 | TAG(48:0)             | 1.95                         | 0.015                |
| 829.32 | TAG(50:0)             | 2.04                         | 0.013                |

Decreased in

BMAA

|        |               |      |        |
|--------|---------------|------|--------|
| 78.97  | PO3-          | 0.73 | -0.034 |
| 96.99  | H2PO4-        | 0.91 | -0.020 |
| 747.45 | PG(16:0/18:1) | 0.89 | -0.007 |
| 833.43 | PI(16:0/18:2) | 0.93 | -0.002 |
| 837.59 | PI(16:0/18:0) | 0.68 | -0.014 |

<sup>1</sup> Tentative assignment based on accurate mass, isotope pattern and literature values. Lipid annotation is based on lipid maps (*1, 2*). Abbreviations: **TME**: trimethylethylimine; **PC**: phosphatidylcholine; **LPC**: lysophosphatidylcholine; **DAG**: diacylglyceride; **TAG**: triacylglyceride; **SM**: sphingomyelin; **PA**: diacylphosphate, **FA**: fatty acids; **AA**: arachnoid acid; **PE**: phosphoethanolamine; **ST**: sulfatide; **PS**: phosphatidylserine; **PG**: phosphatidylglycerol; **PI**: phosphatidylinositol

<sup>2</sup> average fold change in intensity in BMAA compared to Controls.

<sup>3</sup> Loadings on component 1. Positive loadings indicate contribution to BMAA, while negative loading values indicate association with control.

**SI Table 2:** Molecular species that were found changed in the DG between BMAA and control animals as revealed by OPLS DA.

| <b>positive ions</b> |                      |                              |                      |  |
|----------------------|----------------------|------------------------------|----------------------|--|
| Increased in BMAA    |                      |                              |                      |  |
| m/z                  | I.D. <sup>1</sup>    | Ratio BMAA/Ctrl <sup>2</sup> | Loading <sup>3</sup> |  |
| 22.99                | Na+                  | 1.24                         | 0.033                |  |
| 38.97                | K+                   | 1.08                         | 0.018                |  |
| 86.1                 | TME, C5H12N+         | 1.19                         | 0.030                |  |
| 104.1                | Choline, C5H14NO+    | 1.13                         | 0.030                |  |
| 184.09               | C5H15PNO4+           | 1.06                         | 0.014                |  |
| 496.49               | LPC (16:0)           | 1.28                         | 0.012                |  |
| 520.25               | LPC (18:2)           | 1.30                         | 0.029                |  |
| 524.48               | LPC (18:0)           | 1.46                         | 0.023                |  |
| 523.42               | DAG(30:0-OH)         | 1.46                         | 0.020                |  |
| 551.28               | DAG(32:0-OH)         | 1.52                         | 0.029                |  |
| 577.38               | DAG(34:1-OH)         | 1.82                         | 0.037                |  |
| 603.29               | DAG(36:2-OH)         | 1.52                         | 0.032                |  |
| 731.41               | SM(d18:1/18:0)       | 1.40                         | 0.031                |  |
| 734.39               | PC(32:0)             | 1.26                         | 0.020                |  |
| 753.19               | SM(d18:1/18:0)+Na    | 1.49                         | 0.026                |  |
| 756.39               | PC(32:0)+Na          | 1.64                         | 0.035                |  |
| 758.35               | PC(34:2)             | 1.60                         | 0.022                |  |
| 770.41               | PC(32:1)+K           | 1.32                         | 0.030                |  |
| 772.12               | PC(32:0)+K           | 1.54                         | 0.032                |  |
| 780.19               | PC (34:2+Na)         | 1.62                         | 0.020                |  |
| 784.39               | PC(36:3)             | 1.27                         | 0.023                |  |
| 796.29               | PC (34:2+K)          | 1.09                         | 0.010                |  |
| Decreased in BMAA    |                      |                              |                      |  |
| 369.29               | cholesterol C27H45+  | 0.77                         | -0.011               |  |
| 385.27               | cholesterol C27H45O+ | 0.54                         | -0.024               |  |
| 430.27               | Vitamin E, C29H50O2+ | 0.33                         | -0.029               |  |
| <b>negative ions</b> |                      |                              |                      |  |
| Decreased in BMAA    |                      |                              |                      |  |
| 26.01                | CN-                  | 0.72                         | -0.026               |  |
| 42.01                | CNO-                 | 0.66                         | -0.028               |  |
| 62.97                | PO2-                 | 0.78                         | -0.024               |  |
| 78.97                | PO3-                 | 0.83                         | -0.027               |  |
| 96.99                | H2PO4-               | 0.84                         | -0.032               |  |
| 281.25               | FA (18:1)            | 0.67                         | -0.018               |  |
| 283.26               | FA (18:0)            | 0.80                         | -0.019               |  |
| 303.24               | AA                   | 0.76                         | -0.013               |  |

| m/z    | I.D. <sup>1</sup>     | Ratio BMAA/Ctrl <sup>2</sup> | Loading <sup>3</sup> |
|--------|-----------------------|------------------------------|----------------------|
| 385.33 | cholesterol, C27H45O- | 0.55                         | -0.020               |
| 429.3  | Vitamin E, C29H49O2-  | 0.49                         | -0.027               |
| 722.46 | PE(16:0/18:1)         | 0.94                         | -0.009               |
| 726.52 | PE(16:0p/20:4)        | 0.94                         | -0.008               |
| 728.51 | PE(18:1p/18:0)        | 0.84                         | -0.015               |
| 742.52 | PE(18:0p/18:0)        | 0.84                         | -0.013               |
| 744.51 | PE(18:1/18:0)         | 0.80                         | -0.015               |
| 746.48 | PE(16:0p/22:6)        | 0.88                         | -0.013               |
| 747.45 | PG(16:0/18:1)         | 0.88                         | -0.007               |
| 750.47 | PE(18:0p/20:4)        | 0.81                         | -0.020               |
| 762.52 | PE(16:0/22:6)         | 0.93                         | -0.007               |
| 764.52 | PE(18:1/20:4)         | 0.90                         | -0.014               |
| 766.49 | PE(18:0/20:4)         | 0.88                         | -0.007               |
| 770.49 | PE(20:0/18:2)         | 0.75                         | -0.021               |
| 774.59 | PE(18:0p/22:6)        | 0.74                         | -0.019               |
| 778.49 | ST(d18:1/16:0)        | 1.15                         | 0.018                |
| 786.54 | PS(36:2)              | 0.66                         | -0.019               |
| 788.51 | PS(36:1)              | 0.73                         | -0.018               |
| 790.49 | PE(18:0/22:6)         | 0.79                         | -0.013               |
| 806.55 | ST(d18:1/18:0)        | 0.93                         | -0.017               |
| 810.47 | PS(18:0/20:4)         | 0.86                         | -0.013               |
| 833.43 | PI(16:0/18:2)         | 0.76                         | -0.018               |
| 223.19 | PI fragment           | 0.71                         | -0.032               |
| 241.25 | PI fragment           | 0.64                         | -0.031               |
| 837.59 | PI(16:0/18:0)         | 0.36                         | -0.029               |
| 805.51 | TAG(48:0)             | 0.95                         | -0.006               |

1 Tentative assignment based on accurate mass, isotope pattern and literature values. Lipid annotation is based on lipid maps (1, 2). Abbreviations: **TME**: trimethylethylamine; **PC**: phosphatidylcholine; **LPC**: lysophosphatidylcholine; **DAG**: diacylglyceride; **TAG**: triacylglyceride; **SM**: sphingomyelin; **PA**: diacylphosphate, **FA**: fatty acids; **AA**: arachnoid acid; **PE**: phosphoethanolamine; **ST**: sulfatide; **PS**: phosphatidylserine; **PG**: phosphatidylglycerol; **PI**: phosphatidylinositol

2 average fold change in intensity in BMAA compared to Controls.

3 Loadings on component 1. Positive loadings indicate contribution to BMAA, while negative loading values indicate association with control.

1. Fahy, E., Subramaniam, S., Murphy, R. C., Nishijima, M., Raetz, C. R., Shimizu, T., Spener, F., van Meer, G., Wakelam, M. J., and Dennis, E. A. (2009) Update of the LIPID MAPS comprehensive classification system for lipids, *Journal of lipid research* 50 Suppl, S9-14.
2. Fahy, E., Subramaniam, S., Brown, H. A., Glass, C. K., Merrill, A. H., Jr., Murphy, R. C., Raetz, C. R., Russell, D. W., Seyama, Y., Shaw, W., Shimizu, T., Spener, F., van Meer, G., VanNieuwenhze, M. S., White, S. H., Witztum, J. L., and Dennis, E. A. (2005) A comprehensive classification system for lipids, *Journal of lipid research* 46, 839-861.

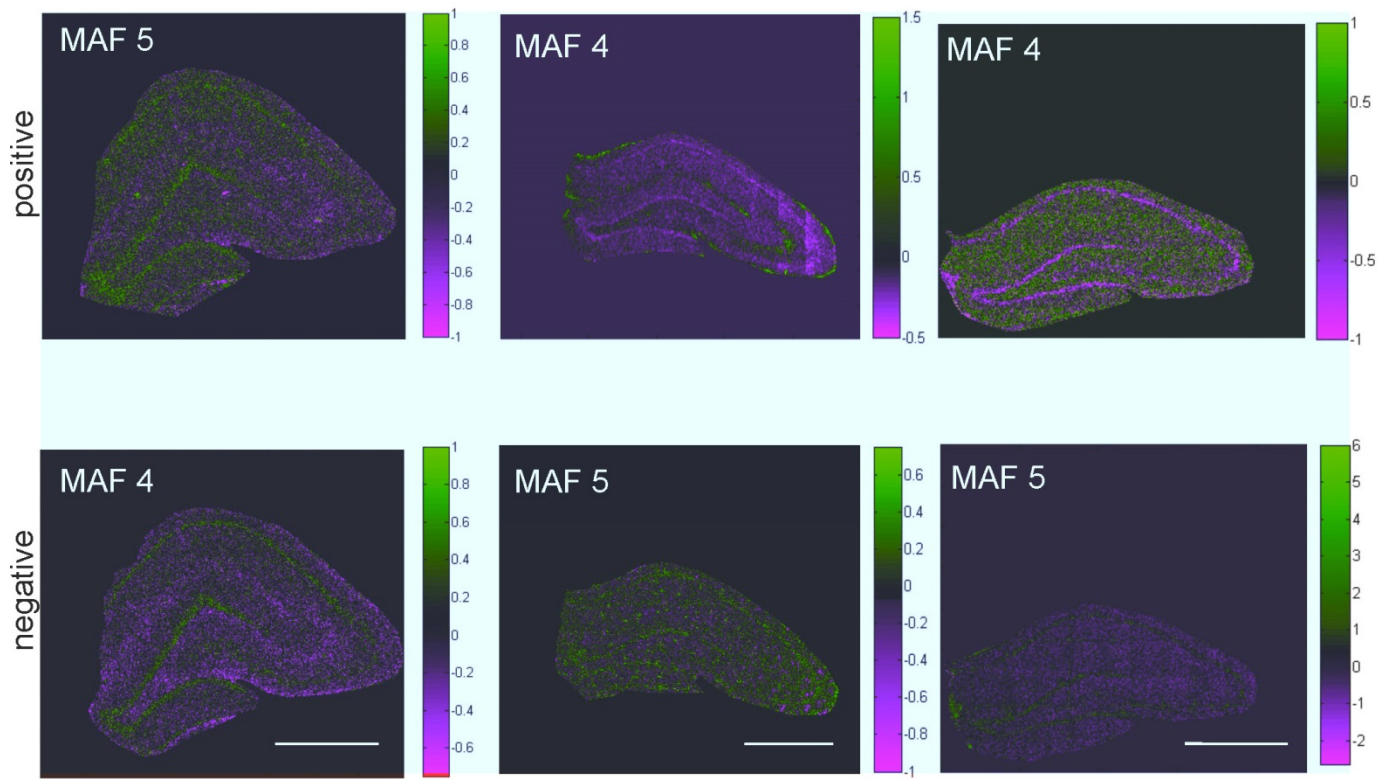

**SI Figure 1. Multivariate image analysis for identification of anatomical regions of interest.**

ToF-SIMS imaging data of the hippocampus of 6-month old control animals (n=3) were acquired in positive and negative ion mode and analyzed by means of maximum autocorrelation factor (MAF) analysis. The composition images depict individual scores (eigenvalues) for each pixel (spectrum) in the corresponding factors (MAF 3-5). The factors capture the variances over the tissue section and allow for an unbiased annotation of regions in the hippocampus based on chemical differences (scale bar = 1 mm).

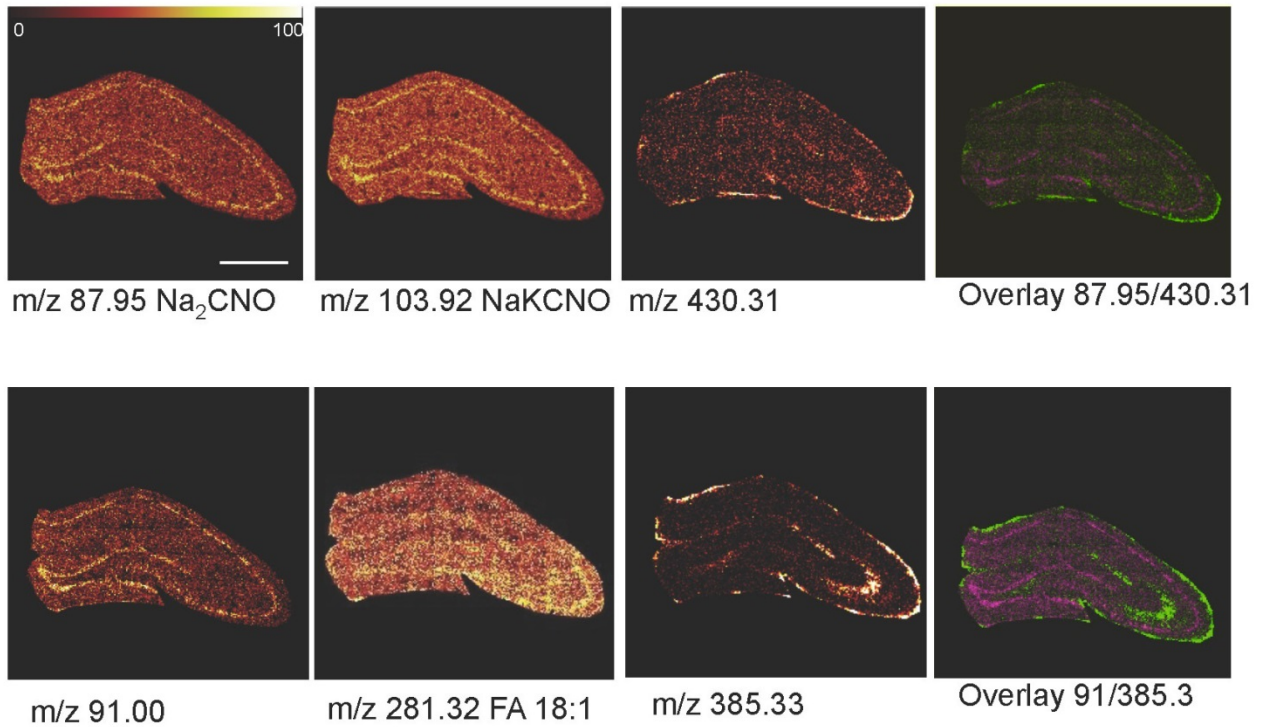

**SI Figure 2. Single ion images of biochemical species that show region specific distributions.**

Positive and negative ion species show characteristic localization patterns that are well in line with anatomical regions of the hippocampus of 6-month old control animals. Protein specific fragments (pos: NaKCNO, Na<sub>2</sub>CNO) were found in highest levels in the CA1-4 and the granular cell layer of the DG. Similar observations were made for a yet unidentified species at m/z 91.00 in negative mode. Vitamin E (Vit.E, [M+H]<sup>+</sup> 430.31), fatty acids (FA 18:1, [M-H]<sup>-</sup> 281.32) and cholesterol (Chol., [M-H]<sup>-</sup> 385.33) were localized to the molecular layer of the DG as well as mossy fibers projecting from the DG to the CA3. Overlay: 87.95: cyan, 430.31 green; 91.00: cyan, 385.3 green. (scale bar = 1mm)

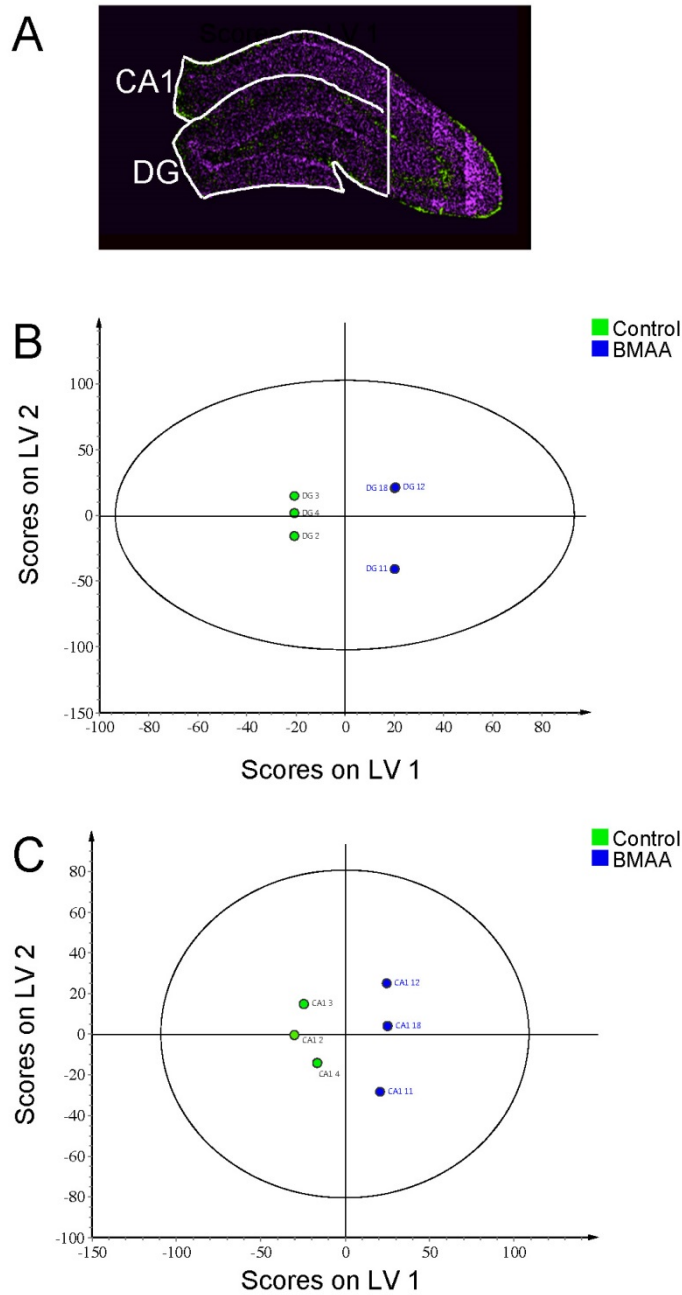

**SI Figure 3. Multivariate analysis of spectral data reveal BMAA-induced hippocampal changes.** MAF analysis was used to segment the hippocampal images into regions representing CA1 and DG (A). OPLS-DA models were calculated for both regions, clearly separating the control group from the BMAA group. (B) The analysis resulted in a 1+3 (1 predictive- + 3 orthogonal components) model for DG. The model explained 86% of the variation in the dataset (R2X cumulative) with a predictive power of 0.96 (Q2 cumulative). (C) For the CA1 a 1+1 (1 predictive- + 3 orthogonal components) model where 53% variation was explained at 0.61 predictive power (Q2 cumulative).



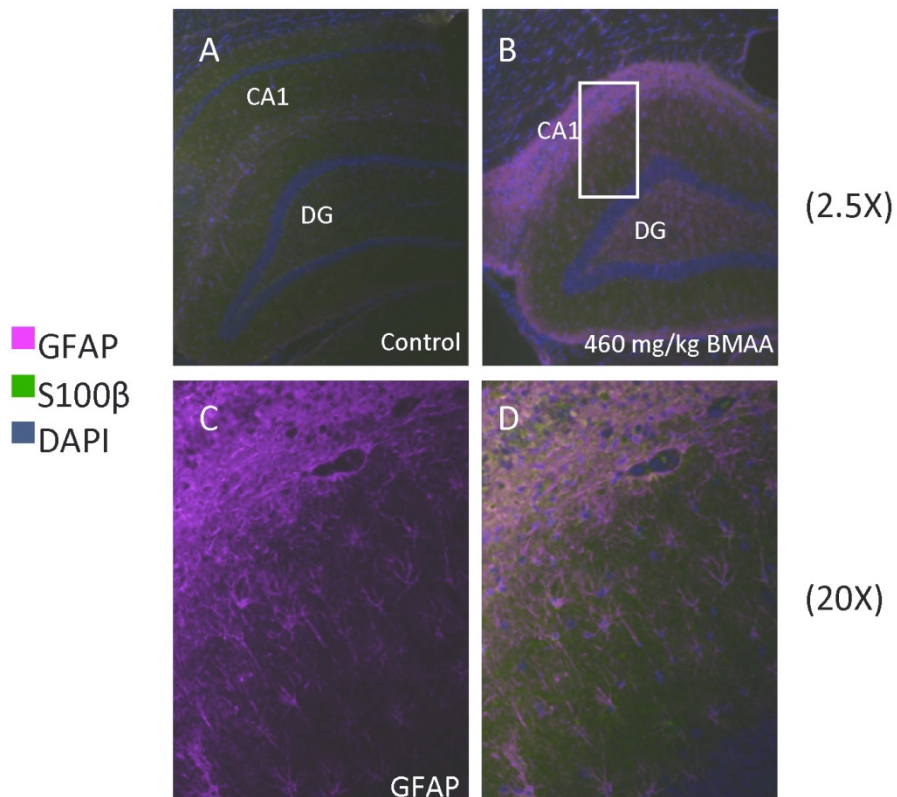

**SI Figure 4. Immunohistochemistry of hippocampus.** Double antigen staining was performed against GFAP and S100 beta on hippocampal sections of control (A) and BMAA exposed animals (B). The data show massive gliosis and reactive astrocyte species localizing to the histopathologically altered region in the hippocampus of BMAA-treated rats. This was indicated by increased GFAP immunoreactivity (cyan) in the CA1 of BMAA exposed animals (B) compared to controls (A). (C) Magnification of outlined area indicated in (B). GFAP positive cells (C) were also found to stain positively for S100 beta (white) serving as additional astrocyte marker (D). Magnifications. A-B lens x 10; C-D lens x 20.
